# Supplementary material for: Biotic and abiotic drivers of tree seedling recruitment across an alpine treeline ecotone
Source: PubMed Central journal article supplement (PMC6052039; doi:10.1038/s41598-018-28808-w), 2018-07-18
Supplement: 41598_2018_28808_MOESM1_ESM.pdf [file 41598_2018_28808_MOESM1_ESM.pdf]

# **Biotic and abiotic drivers of tree seedling recruitment across an alpine treeline ecotone**

Esther R. Frei <sup>1,2\*</sup>, Eva Bianchi<sup>1,3</sup>, Giulietta Bernareggi<sup>1,4</sup>, Peter Bebi<sup>1</sup>, Melissa A. Dawes<sup>1,2</sup>, Carissa D. Brown<sup>5</sup>, Andrew J. Trant<sup>6</sup>, Steven D. Mamet<sup>7</sup>, and Christian Rixen<sup>1</sup>

<sup>1</sup>WSL Institute for Snow and Avalanche Research SLF, Flüelastrasse 11, 7260 Davos Dorf, Switzerland

<sup>2</sup>Swiss Federal Institute for Forest, Snow and Landscape Research WSL, Zürcherstrasse 111, 8903 Birmensdorf, Switzerland

<sup>3</sup>Institute of Terrestrial Ecosystems, Department of Environmental Systems Science, ETH Zurich. Universitätstrasse 22, 8092 Zurich, Switzerland

<sup>4</sup>Dipartimento di Bioscienze, Università di Parma, Parco Area delle Scienze 11/A, 43124 Parma, Italy

<sup>5</sup>Department of Geography, Memorial University, 230 Elizabeth Avenue, St John's, NL, A1B 3X9 Canada

<sup>6</sup>School of Environment, Resources and Sustainability, University of Waterloo, 200 University Avenue West, Waterloo, ON, N2L 3G1 Canada

<sup>7</sup>Department of Soil Science, University of Saskatchewan, 51 Campus Drive, Saskatoon, SK S7N 5A8 Canada

\*Correspondence: Esther R. Frei, e-mail: [estherfrei@gmx.net](mailto:estherfrei@gmx.net)

## Supplementary Information

**Table S1.** Number of seedlings for emergence (a), first winter survival (b), and second winter survival (c), grouped by species and provenance per species for experimental site, scarification treatment, seeding year, and herbivore exclosure treatment.

|                                           | Total | <i>L. decidua</i> | <i>P. abies</i> | LL  | LH | PL  | PH  |
|-------------------------------------------|-------|-------------------|-----------------|-----|----|-----|-----|
| <b>(a) Emergence</b>                      |       |                   |                 |     |    |     |     |
| Forest site                               | 12    | 5                 | 7               | 4   | 1  | 6   | 1   |
| Treeline site                             | 734   | 311               | 423             | 288 | 23 | 295 | 128 |
| Alpine site                               | 981   | 452               | 529             | 421 | 31 | 288 | 241 |
| Scarified                                 | 997   | 438               | 559             | 398 | 40 | 366 | 193 |
| Intact                                    | 730   | 330               | 400             | 315 | 15 | 223 | 177 |
| Seeded 2013                               | 804   | 345               | 459             | 324 | 21 | 317 | 142 |
| Seeded 2014                               | 923   | 423               | 500             | 389 | 34 | 272 | 228 |
| Exclosures                                | 983   | 434               | 549             | 404 | 30 | 355 | 194 |
| Unprotected                               | 744   | 334               | 410             | 309 | 25 | 234 | 176 |
| <b>(b) 1<sup>st</sup> winter survival</b> |       |                   |                 |     |    |     |     |
| Forest site                               | 0     | 0                 | 0               | 0   | 0  | 0   | 0   |
| Treeline site                             | 348   | 164               | 184             | 148 | 16 | 147 | 37  |
| Alpine site                               | 60    | 51                | 9               | 50  | 1  | 5   | 4   |
| Scarified                                 | 344   | 173               | 171             | 157 | 16 | 131 | 40  |
| Intact                                    | 64    | 42                | 22              | 41  | 1  | 21  | 1   |
| Seeded 2013                               | 302   | 132               | 170             | 121 | 11 | 135 | 35  |
| Seeded 2014                               | 106   | 83                | 23              | 77  | 6  | 17  | 6   |
| Exclosures                                | 236   | 119               | 117             | 112 | 7  | 97  | 20  |
| Unprotected                               | 172   | 96                | 76              | 86  | 10 | 55  | 21  |
| <b>(c) 2<sup>nd</sup> winter survival</b> |       |                   |                 |     |    |     |     |
| Forest site                               | 0     | 0                 | 0               | 0   | 0  | 0   | 0   |
| Treeline site                             | 227   | 104               | 123             | 96  | 8  | 94  | 29  |
| Alpine site                               | 9     | 7                 | 2               | 7   | 0  | 0   | 2   |
| Scarified                                 | 229   | 104               | 125             | 96  | 8  | 94  | 31  |
| Intact                                    | 7     | 7                 | 0               | 7   | 0  | 0   | 0   |
| Seeded 2013                               | 236   | 111               | 125             | 103 | 8  | 94  | 31  |
| Seeded 2014                               | –     | –                 | –               | –   | –  | –   | –   |
| Exclosures                                | 127   | 53                | 74              | 52  | 1  | 58  | 16  |
| Unprotected                               | 109   | 58                | 51              | 51  | 7  | 36  | 15  |

LL: *L. decidua* from low-elevation provenance, LH: *L. decidua* from high-elevation provenance; PL: *P. abies* from low-elevation provenance, PH: *P. abies* from high-elevation provenance.

**Table S2.** Monthly mean soil temperatures (mean  $\pm$  1 standard deviation) for the experimental sites from July 2013 to August 2015.

| Year | Month     | Soil temperature forest site [°C] | Soil temperature treeline site [°C] | Soil temperature alpine site [°C] |
|------|-----------|-----------------------------------|-------------------------------------|-----------------------------------|
| 2013 | July      | 10.3 $\pm$ 1.1                    | –                                   | –                                 |
|      | August    | 9.7 $\pm$ 1.4                     | 9.3 $\pm$ 0.9                       | 11.3 $\pm$ 2.3                    |
|      | September | 7.0 $\pm$ 1.6                     | 6.8 $\pm$ 1.2                       | 6.6 $\pm$ 2.5                     |
|      | October   | 4.8 $\pm$ 1.9                     | 4.8 $\pm$ 1.3                       | 3.2 $\pm$ 2.2                     |
|      | November  | 1.5 $\pm$ 0.9                     | 2.1 $\pm$ 0.5                       | 0.7 $\pm$ 0.1                     |
|      | December  | 0.3 $\pm$ 0.1                     | 0.8 $\pm$ 0.2                       | 0.4 $\pm$ 0.1                     |
| 2014 | January   | 0.4 $\pm$ 0.0                     | 0.8 $\pm$ 0.0                       | 0.3 $\pm$ 0.0                     |
|      | February  | 0.4 $\pm$ 0.0                     | 0.8 $\pm$ 0.0                       | 0.3 $\pm$ 0.0                     |
|      | March     | 0.4 $\pm$ 0.0                     | 0.8 $\pm$ 0.0                       | 0.3 $\pm$ 0.0                     |
|      | April     | 0.5 $\pm$ 0.3                     | 0.7 $\pm$ 0.0                       | 0.3 $\pm$ 0.0                     |
|      | May       | 4.7 $\pm$ 2.1                     | 3.3 $\pm$ 2.0                       | 0.7 $\pm$ 0.7                     |
|      | June      | 8.4 $\pm$ 1.5                     | 8.6 $\pm$ 1.4                       | 9.2 $\pm$ 3.7                     |
|      | July      | 8.7 $\pm$ 1.1                     | 9.4 $\pm$ 1.1                       | 9.9 $\pm$ 2.5                     |
|      | August    | 8.5 $\pm$ 1.2                     | 9.0 $\pm$ 1.3                       | 9.4 $\pm$ 1.8                     |
|      | September | 7.3 $\pm$ 1.2                     | 7.2 $\pm$ 1.3                       | 6.9 $\pm$ 1.7                     |
|      | October   | 5.2 $\pm$ 2.4                     | 4.9 $\pm$ 1.6                       | 3.8 $\pm$ 2.1                     |
|      | November  | 1.9 $\pm$ 0.7                     | 1.9 $\pm$ 0.3                       | 0.6 $\pm$ 0.1                     |
|      | December  | 0.3 $\pm$ 0.6                     | 0.6 $\pm$ 0.4                       | 0.4 $\pm$ 0.0                     |
| 2015 | January   | 0.2 $\pm$ 0.1                     | 0.3 $\pm$ 0.1                       | 0.3 $\pm$ 0.0                     |
|      | February  | 0.2 $\pm$ 0.0                     | 0.4 $\pm$ 0.0                       | 0.2 $\pm$ 0.0                     |
|      | March     | 0.2 $\pm$ 0.0                     | 0.4 $\pm$ 0.0                       | 0.2 $\pm$ 0.0                     |
|      | April     | 0.3 $\pm$ 0.0                     | 0.4 $\pm$ 0.0                       | 0.3 $\pm$ 0.0                     |
|      | May       | 4.6 $\pm$ 2.2                     | 3.0 $\pm$ 2.2                       | 2.7 $\pm$ 3.1                     |
|      | June      | 9.1 $\pm$ 1.5                     | 9.5 $\pm$ 1.3                       | 11.1 $\pm$ 3.0                    |
|      | July      | 11.5 $\pm$ 1.2                    | 12.4 $\pm$ 1.1                      | 16.3 $\pm$ 2.3                    |
|      | August    | 10.8 $\pm$ 1.4                    | 11.2 $\pm$ 1.4                      | 13.3 $\pm$ 2.7                    |

**Table S3.** Dates of springtime snowmelt, and beginning and end of growing season based on soil temperatures at the three experimental sites in 2013 – 2015. Dates are indicated as DOY (day of the year).

| Site     | 2013      |                      | 2014               |           |                      | 2015               |           |                      |                    |
|----------|-----------|----------------------|--------------------|-----------|----------------------|--------------------|-----------|----------------------|--------------------|
|          | Snow-melt | Growing season start | Growing season end | Snow-melt | Growing season start | Growing season end | Snow-melt | Growing season start | Growing season end |
| Forest   | NA        | NA                   | 285                | 123       | 126                  | 296                | 124       | 126                  | NA                 |
| Treeline | NA        | NA                   | 298                | 133       | 136                  | 297                | 132       | 134                  | NA                 |
| Alpine   | NA        | NA                   | 284                | 153       | 155                  | 295                | 131       | 133                  | NA                 |

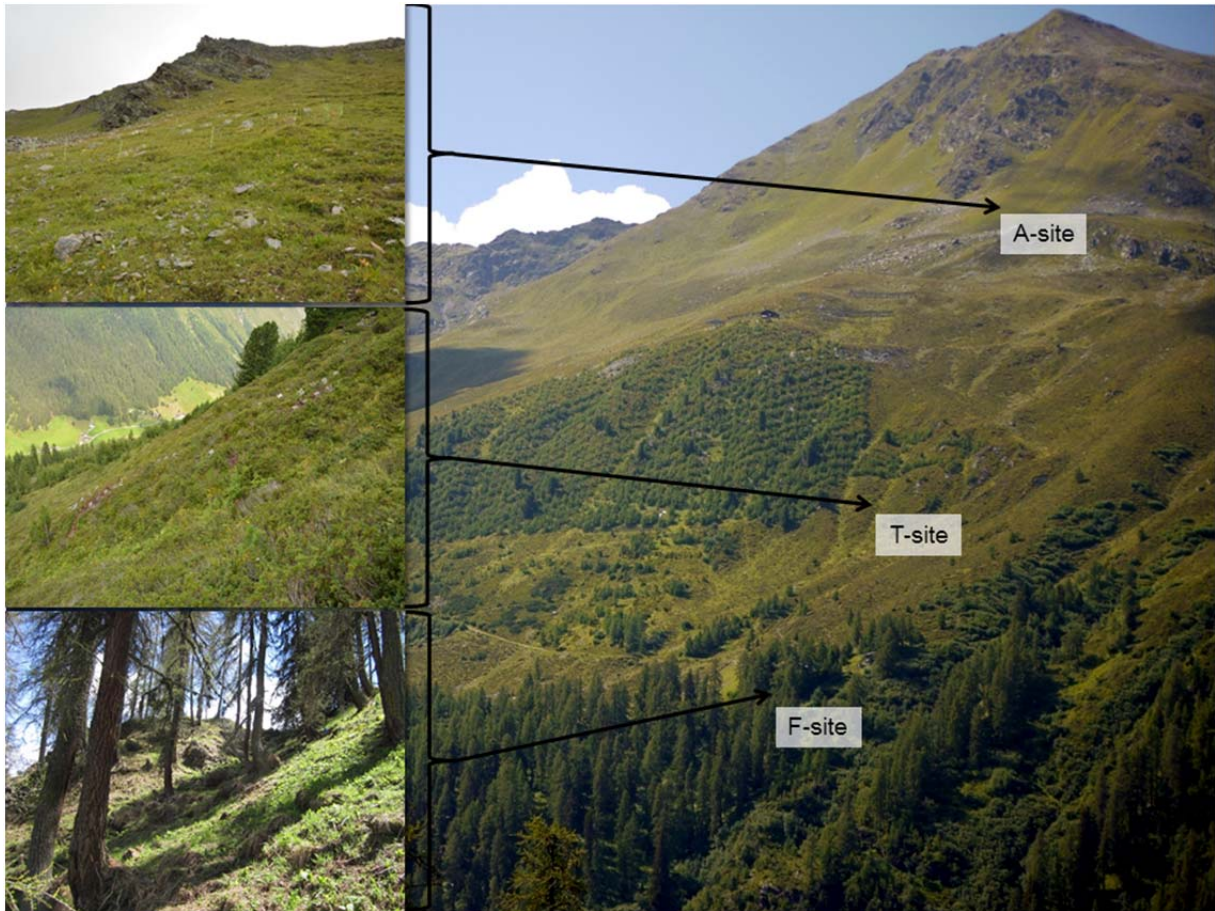

**Figure S1.** Location of the forest (1,930 m a.s.l.), treeline (2,090 m a.s.l.), and alpine (2,410 m a.s.l.) sites across the alpine treeline ecotone in the Dischma valley, Davos, Switzerland (Photos: M.A. Dawes, E.R. Frei).

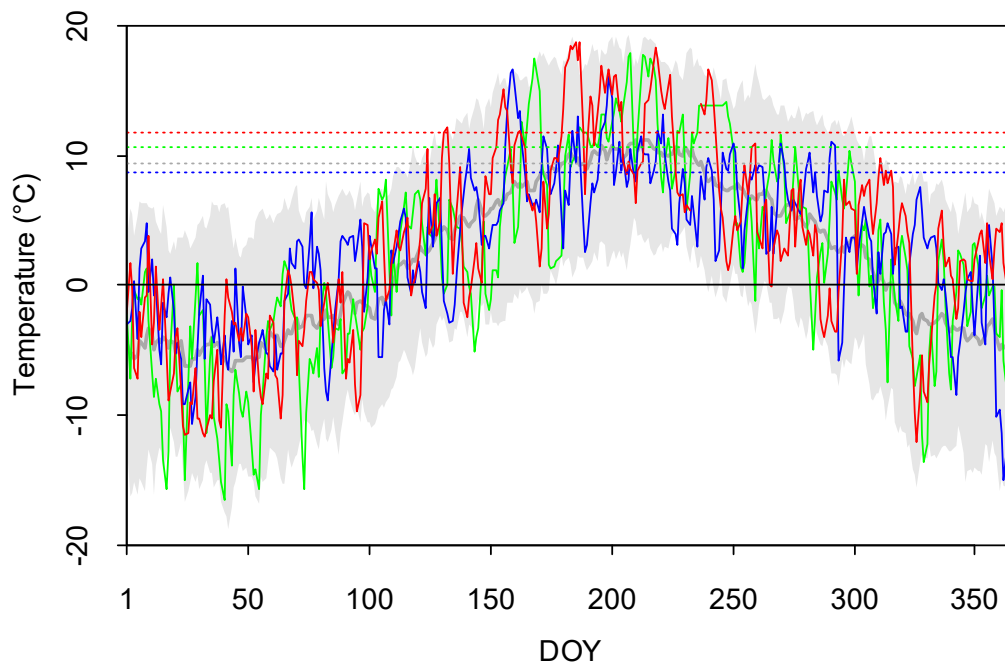

**Figure S2.** Air temperatures in the three study years 2013 (green), 2014 (blue), and 2015 (red) at the Stillberg climate station at 2,090 m a.s.l. (46.774 °N; 9.867 °E). Mean summer air temperatures (JJA) for each year are indicated by a dotted line in the respective colour. Average air temperatures for the 1975 – 2015 period are shown by the grey line with the grey shading indicating  $\pm 2$  standard deviations and the grey dotted line indicating the average (1975 – 2015) mean summer air temperatures (JJA).

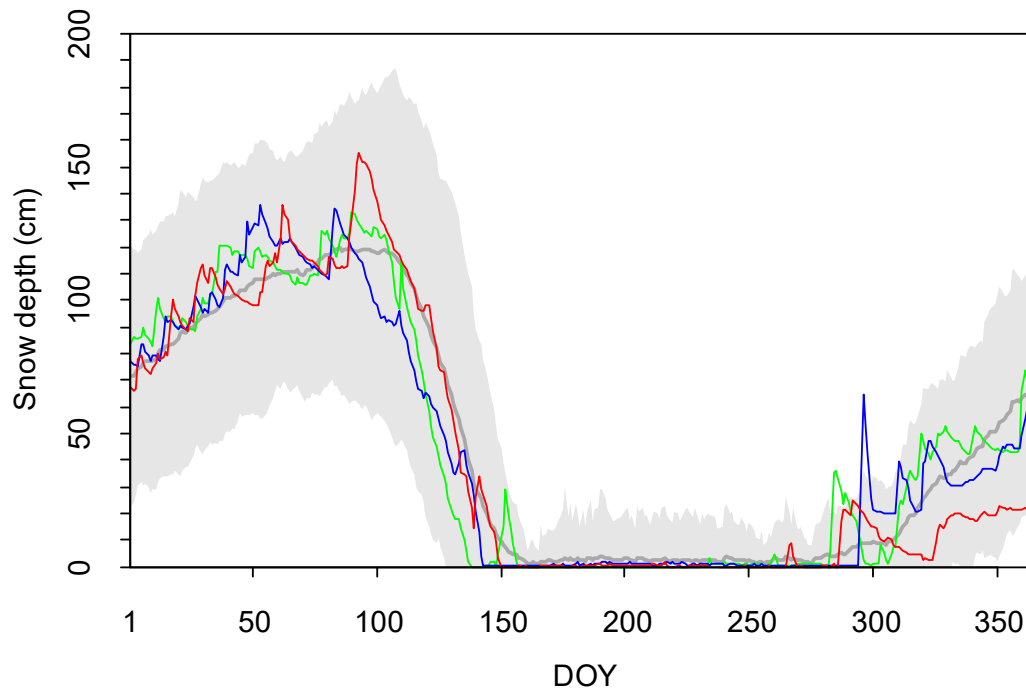

**Figure S3.** Snow depth in the three study years 2013 (green), 2014 (blue), and 2015 (red) at the Stillberg climate station at 2,090 m a.s.l. (46.774 °N; 9.867 °E). Average snow depth for the 1975 – 2015 period is shown by the grey line with the grey shading indicating  $\pm 2$  standard deviations.

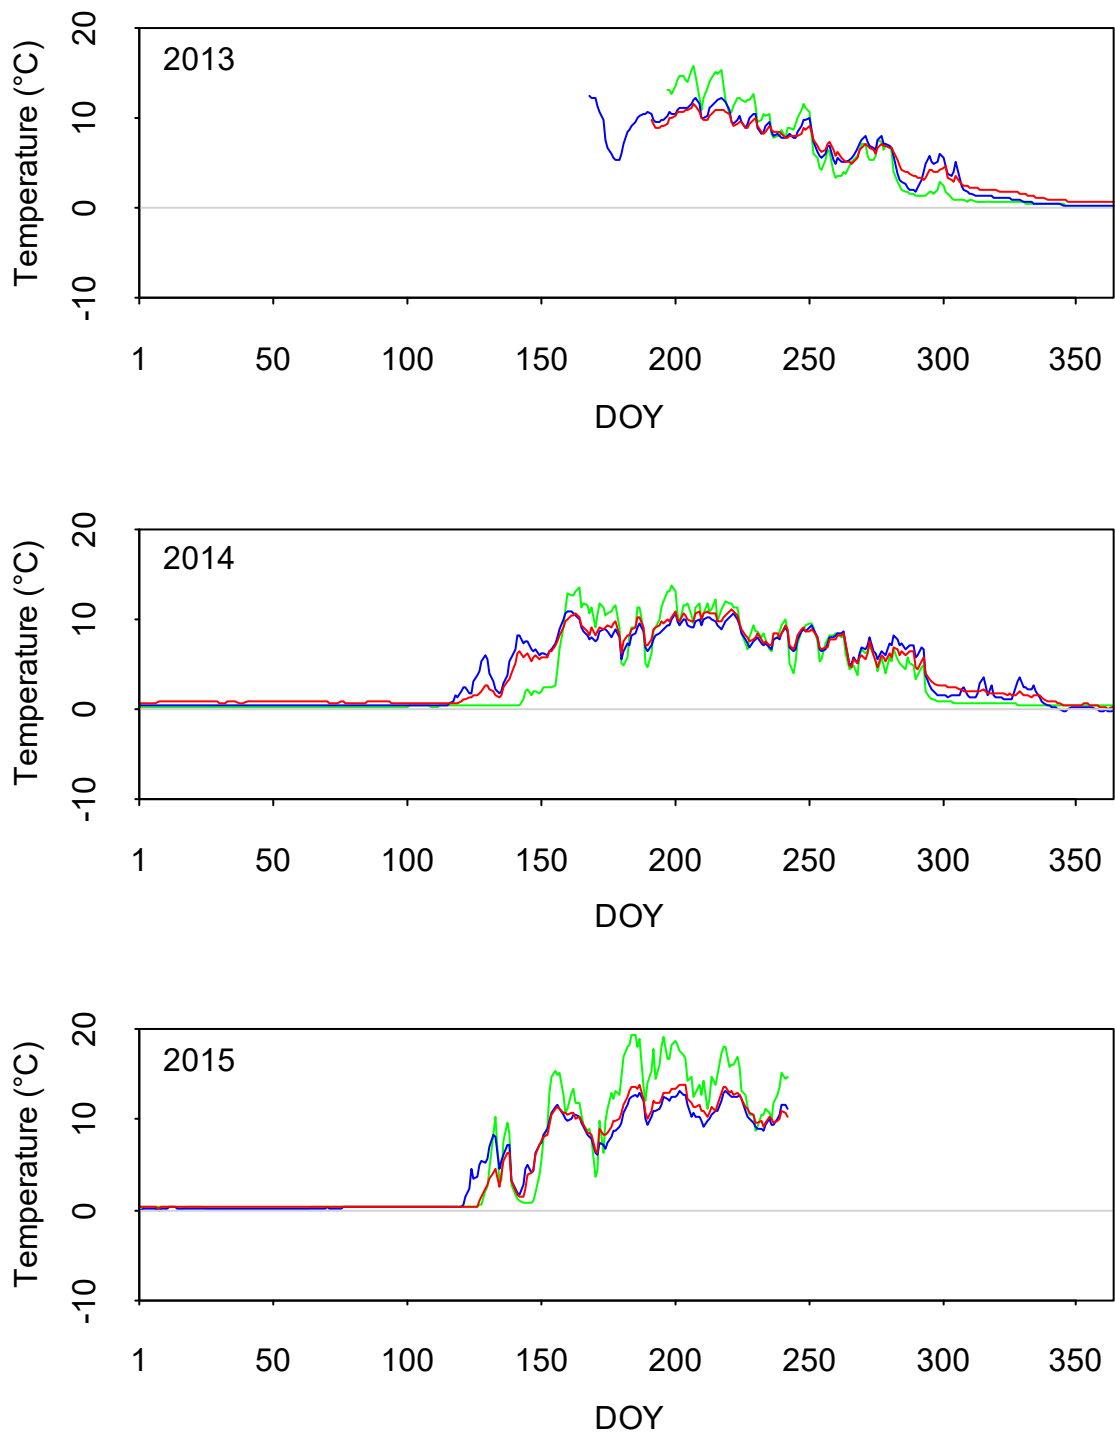

**Figure S4.** Daily mean soil temperatures for the alpine (green), treeline (blue), and forest (red) sites from July 2013 to August 2015 measured by iButtons (Maxim Integrated Products, Sunnyvale, CA, USA) at 5 cm soil depth.



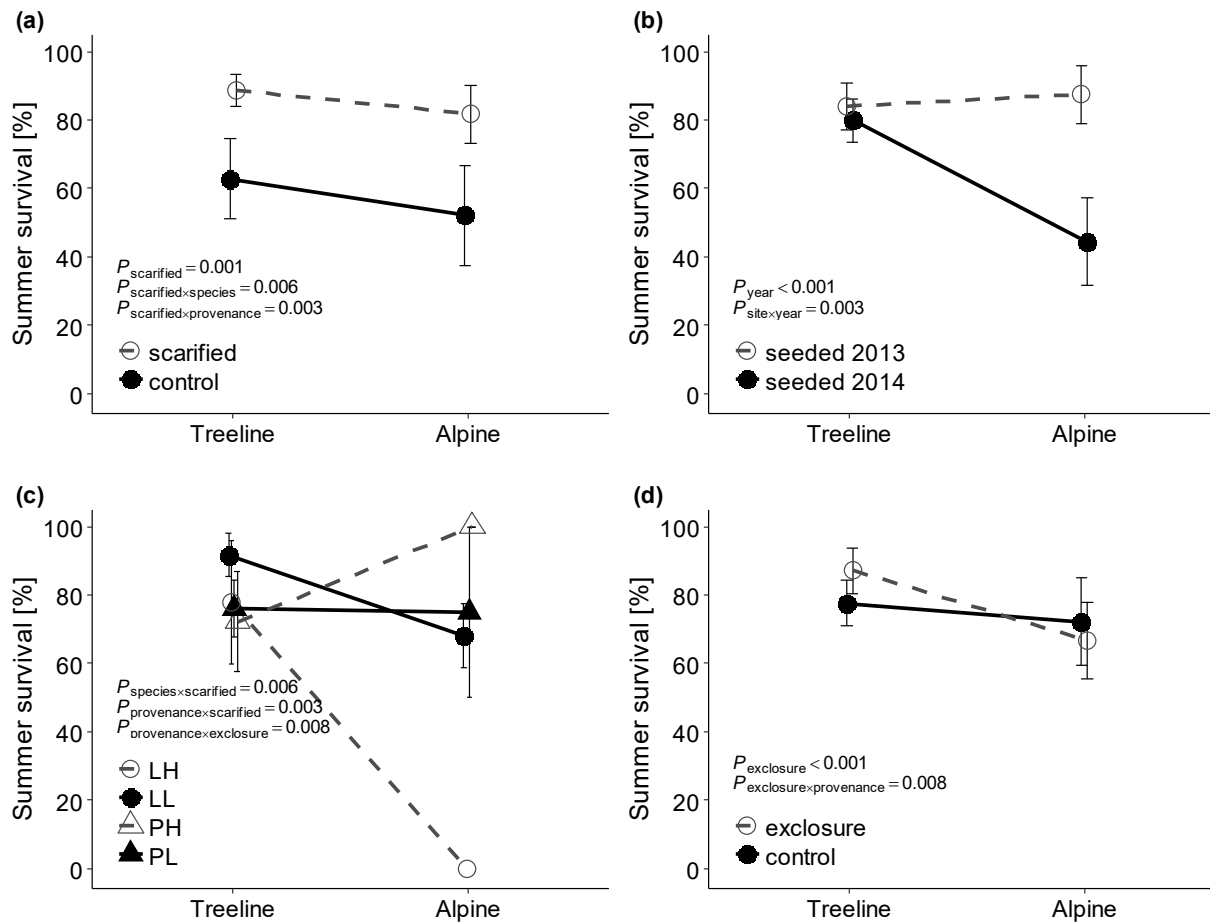

**Figure S5.** Effects of scarification treatment (a), seeding year (b), provenance and species (c), and herbivore exclusion treatment (d) on summer survival of seedlings at the treeline and alpine sites ( $n = 355$ ). LL: low-elevation provenance of *L. decidua*; LH: high-elevation provenance of *L. decidua*; PL: low-elevation provenance of *P. abies*; PH: high-elevation provenance of *P. abies*. *P*-values indicate significant effects and interactions from likelihood ratio tests of mixed-effects models (data not shown). Error bars indicate  $\pm 1$  standard error of trait means.
